# Supplementary material for: Infections as a Risk Factor for and Prognostic Factor After Substance-Induced Psychoses
Source: Atypon-hosted journal article supplement (doi:10.1176/appi.ajp.2019.19101047), 2020-02-12
Supplement: appi.ajp.2019.19101047.ds001.pdf [file appi.ajp.2019.19101047.ds001.pdf]

**TABLE S1. Diagnostic codes used to define infections**

| Site of infection           | ICD-8 codes                                                                                                                                       | ICD-10 codes                                                                                                                                                                                                           |
|-----------------------------|---------------------------------------------------------------------------------------------------------------------------------------------------|------------------------------------------------------------------------------------------------------------------------------------------------------------------------------------------------------------------------|
| Hepatitis                   | 070                                                                                                                                               | B15–B19                                                                                                                                                                                                                |
| Sepsis                      | 038                                                                                                                                               | A40–A41                                                                                                                                                                                                                |
| Gastrointestinal infection  | 000–009, 540                                                                                                                                      | A00–A09, K35                                                                                                                                                                                                           |
| Skin infection              | 035, 050–057, 110–111, 680–686                                                                                                                    | B00–B09, A46, L00–L08                                                                                                                                                                                                  |
| Respiratory infection       | 460–486                                                                                                                                           | J00–J18                                                                                                                                                                                                                |
| Pregnancy-related infection | 630, 635, 670                                                                                                                                     | O23, O264, O85–O86, O98                                                                                                                                                                                                |
| Urogenital infection        | 612, 620, 622, 590, 59500–59501                                                                                                                   | N300, N518B, N70–N72, N76, N770D, N771B, N771L                                                                                                                                                                         |
| CNS infection               | 013, 02701, 03609, 04000–04399, 045–046, 05201, 05302, 05403, 05501, 05601, 062–065, 07199, 07202, 07501, 07929, 09049, 0949, 320–324, 392, 47400 | DA022C, DA066, DA17, DA229C, DA321, DA390, DA504, DA514B, DA521A–B, DA548A,D, DA80–DA89, DB003–DB004, DB010–DB011, DB020–DB021, DB050–DB051, DB060, DB261–DB262, DB375, DB451, DB582, DB602, DE236A, DG0, DI02, DP352A |
| Other types of infection    | Remaining infections within the general chapters 000–136, 710                                                                                     | Remaining infections within the general chapters A, B, M00                                                                                                                                                             |

**TABLE S2. Associations between infections and incident alcohol-induced psychosis**

|                            | <b>Model 1</b>             | <b>Model 2</b>            |
|----------------------------|----------------------------|---------------------------|
| Any infection              | 2.15 (1.61-2.85), p<0.001  | 1.60 (1.20-2.14), p=0.001 |
| Hepatitis                  | 7.13 (1.77-28.77), p=0.006 | 2.61 (0.64-10.61), p=0.18 |
| Sepsis                     | 1.26 (0.40-3.94), p=0.69   | 1.04 (0.33-3.26), p=0.95  |
| Gastrointestinal infection | 1.47 (0.98-2.22), p=0.06   | 1.15 (0.76-1.73), p=0.51  |
| Skin infection             | 2.44 (1.65-3.62), p<0.001  | 1.81 (1.22-2.68), p=0.003 |
| Respiratory infection      | 1.58 (1.14-2.18), p=0.006  | 1.20 (0.87-1.66), p=0.28  |
| Urogenital infection       | 2.33 (1.08-5.02), p=0.03   | 1.56 (0.72-3.40), p=0.26  |
| CNS infection              | 1.94 (0.72-5.23), p=0.19   | 1.61 (0.60-4.34), p=0.35  |
| Other infections           | 2.46 (1.68-3.60), p<0.001  | 1.89 (1.29-2.77), p=0.001 |
|                            |                            |                           |
|                            |                            |                           |
|                            |                            |                           |

Each type of infection entered into the Cox regression models as a time-varying covariate. Model 1 adjusted for sex, birth year, and calendar year. Model 2 further adjusted for alcohol or substance use disorder as a time-varying covariate, as well as parental education, parental abuse, parental psychotic disorder, and other parental psychiatric disorders.

**TABLE S3. Associations between infections and incident opioid-induced psychosis**

|                            | <b>Model 1</b>              | <b>Model 2</b>              |
|----------------------------|-----------------------------|-----------------------------|
| Any infection              | 3.59 (1.66-7.73), p=0.001   | 2.59 (1.19-5.63), p=0.02    |
| Hepatitis                  | Inestimable                 | Inestimable                 |
| Sepsis                     | 6.02 (1.43-25.36), p=0.01   | 5.11 (1.21-21.58), p=0.03   |
| Gastrointestinal infection | 2.96 (1.26-6.95), p=0.01    | 2.19 (0.93-5.15), p=0.07    |
| Skin infection             | 4.52 (1.92-10.64), p=0.001  | 3.24 (1.37-7.68), p=0.008   |
| Respiratory infection      | 2.82 (1.33-5.97), p=0.007   | 2.08 (0.98-4.45), p=0.06    |
| Urogenital infection       | 7.01 (2.02-24.36), p=0.002  | 4.60 (1.27-16.58), p=0.02   |
| CNS infection              | 15.57 (5.40-44.90), p<0.001 | 12.55 (4.34-36.34), p<0.001 |
| Other infections           | 1.45 (0.44-4.80), p=0.55    | 1.05 (0.32-3.51), p=0.93    |
|                            |                             |                             |
|                            |                             |                             |
|                            |                             |                             |

Each type of infection entered into the Cox regression models as a time-varying covariate. Model 1 adjusted for sex, birth year, and calendar year. Model 2 further adjusted for alcohol or substance use disorder as a time-varying covariate, as well as parental education, parental abuse, parental psychotic disorder, and other parental psychiatric disorders.

**TABLE S4. Associations between infections and incident cannabis-induced psychosis**

|                            | <b>Model 1</b>            | <b>Model 2</b>            |
|----------------------------|---------------------------|---------------------------|
| Any infection              | 1.52 (1.38-1.67) p<0.001  | 1.21 (1.10-1.33), p<0.001 |
| Hepatitis                  | 1.73 (0.65-4.62), p=0.27  | 0.74 (0.28-1.97), p=0.55  |
| Sepsis                     | 1.66 (1.19-2.33), p=0.003 | 1.41 (1.01-1.98), p=0.04  |
| Gastrointestinal infection | 1.25 (1.08-1.45), p=0.003 | 1.04 (0.90-1.20), p=0.63  |
| Skin infection             | 1.56 (1.33-1.82), p<0.001 | 1.23 (1.05-1.44), p=0.009 |
| Respiratory infection      | 1.34 (1.20-1.50), p<0.001 | 1.08 (0.97-1.21), p=0.18  |
| Urogenital infection       | 2.43 (1.86-3.17), p<0.001 | 1.81 (1.39-2.37), p<0.001 |
| CNS infection              | 1.48 (1.00-2.19), p=0.05  | 1.26 (0.85-1.87), p=0.25  |
| Other infections           | 1.50 (1.29-1.75), p<0.001 | 1.22 (1.05-1.42), p=0.009 |
|                            |                           |                           |
|                            |                           |                           |
|                            |                           |                           |

Each type of infection entered into the Cox regression models as a time-varying covariate. Model 1 adjusted for sex, birth year, and calendar year. Model 2 further adjusted for alcohol or substance use disorder as a time-varying covariate, as well as parental education, parental abuse, parental psychotic disorder, and other parental psychiatric disorders.

**TABLE S5. Associations between infections and incident cocaine-induced psychosis**

|                            | <b>Model 1</b>              | <b>Model 2</b>             |
|----------------------------|-----------------------------|----------------------------|
| Any infection              | 2.59 (1.91-3.51), p<0.001   | 1.94 (1.42-2.64), p<0.001  |
| Hepatitis                  | 19.17 (7.86-46.75), p<0.001 | 6.92 (2.80-17.10), p<0.001 |
| Sepsis                     | 2.29 (0.94-5.57), p=0.07    | 1.90 (0.80-4.62), p=0.16   |
| Gastrointestinal infection | 2.20 (1.51-3.19), p<0.001   | 1.72 (1.18-2.49), p=0.005  |
| Skin infection             | 3.04 (2.08-4.43), p<0.001   | 2.27 (1.55-3.32), p<0.001  |
| Respiratory infection      | 1.92 (1.39-2.65), p<0.001   | 1.45 (1.05-2.02), p=0.02   |
| Urogenital infection       | 2.13 (0.93-4.89), p=0.08    | 1.42 (0.62-3.28), p=0.41   |
| CNS infection              | 1.06 (0.26-4.29), p=0.93    | 0.88 (0.22-3.55), p=0.86   |
| Other infections           | 2.31 (1.55-3.45), p<0.001   | 1.77 (1.18-2.65), p=0.005  |
|                            |                             |                            |
|                            |                             |                            |
|                            |                             |                            |

Each type of infection entered into the Cox regression models as a time-varying covariate. Model 1 adjusted for sex, birth year, and calendar year. Model 2 further adjusted for alcohol or substance use disorder as a time-varying covariate, as well as parental education, parental abuse, parental psychotic disorder, and other parental psychiatric disorders.

**TABLE S6. Associations between infections and incident amphetamine-induced psychosis**

|                            | <b>Model 1</b>              | <b>Model 2</b>            |
|----------------------------|-----------------------------|---------------------------|
| Any infection              | 1.64 (1.37-1.97), p<0.001   | 1.22 (1.02-1.47), p=0.03  |
| Hepatitis                  | 10.44 (4.94-22.04), p<0.001 | 3.78 (1.78-8.04), p=0.001 |
| Sepsis                     | 2.65 (1.58-4.43), p<0.001   | 2.13 (1.27-3.56), p=0.004 |
| Gastrointestinal infection | 1.33 (1.02-1.75), p=0.04    | 1.04 (0.80-1.37), p=0.75  |
| Skin infection             | 1.80 (1.36-2.38), p<0.001   | 1.34 (1.01-1.77), p=0.04  |
| Respiratory infection      | 1.42 (1.15-1.76), p=0.001   | 1.07 (0.86-1.32), p=0.55  |
| Urogenital infection       | 1.76 (1.00-3.08), p=0.05    | 1.19 (0.70-2.09), p=0.54  |
| CNS infection              | 0.40 (0.10-1.60), p=0.20    | 0.33 (0.08-1.31), p=0.11  |
| Other infections           | 1.73 (1.31-2.28), p<0.001   | 1.34 (1.01-1.76), p=0.04  |
|                            |                             |                           |
|                            |                             |                           |
|                            |                             |                           |

Each type of infection entered into the Cox regression models as a time-varying covariate. Model 1 adjusted for sex, birth year, and calendar year. Model 2 further adjusted for alcohol or substance use disorder as a time-varying covariate, as well as parental education, parental abuse, parental psychotic disorder, and other parental psychiatric disorders.

**TABLE S7. Associations between infections and incident hallucinogen-induced psychosis**

|                            | <b>Model 1</b>            | <b>Model 2</b>            |
|----------------------------|---------------------------|---------------------------|
| Any infection              | 1.05 (0.69-1.59), p=0.84  | 0.80 (0.52-1.22), p=0.30  |
| Hepatitis                  | 8.16 (1.14-58.65), p=0.04 | 3.48 (0.48-25.32), p=0.22 |
| Sepsis                     | 2.63 (0.83-8.32), p=0.10  | 2.12 (0.67-6.72), p=0.20  |
| Gastrointestinal infection | 1.22 (0.65-2.29), p=0.54  | 0.99 (0.53-1.86), p=0.98  |
| Skin infection             | 0.94 (0.41-2.15), p=0.88  | 0.71 (0.31-1.64), p=0.43  |
| Respiratory infection      | 1.06 (0.63-1.77), p=0.84  | 0.82 (0.49-1.37), p=0.45  |
| Urogenital infection       | 3.08 (1.11-8.55), p=0.03  | 2.23 (0.80-6.26), p=0.13  |
| CNS infection              | 1.06 (0.15-7.58), p=0.96  | 0.84 (0.11-6.06), p=0.87  |
| Other infections           | 0.99 (0.46-2.14), p=0.98  | 0.78 (0.36-1.69), p=0.53  |
|                            |                           |                           |
|                            |                           |                           |
|                            |                           |                           |

Each type of infection entered into the Cox regression models as a time-varying covariate. Model 1 adjusted for sex, birth year, and calendar year. Model 2 further adjusted for alcohol or substance use disorder as a time-varying covariate, as well as parental education, parental abuse, parental psychotic disorder, and other parental psychiatric disorders.

**TABLE S8. Associations between infections and incident substance-induced psychosis induced by other or mixed substances**

|                            | <b>Model 1</b>               | <b>Model 2</b>            |
|----------------------------|------------------------------|---------------------------|
| Any infection              | 1.75 (1.59-1.94), p<0.001    | 1.29 (1.16-1.43), p<0.001 |
| Hepatitis                  | 15.05 (10.54-21.48), p<0.001 | 5.88 (4.10-8.42), p<0.001 |
| Sepsis                     | 1.90 (1.36-2.64), p<0.001    | 1.53 (1.10-2.13), p=0.01  |
| Gastrointestinal infection | 1.44 (1.25-1.67), p<0.001    | 1.11 (0.96-1.29), p=0.15  |
| Skin infection             | 1.75 (1.50-2.05), p<0.001    | 1.29 (1.10-1.51), p=0.002 |
| Respiratory infection      | 1.51 (1.34-1.69), p<0.001    | 1.12 (1.00-1.26), p=0.05  |
| Urogenital infection       | 2.43 (1.85-3.21), p<0.001    | 1.62 (1.23-2.15), p=0.001 |
| CNS infection              | 0.68 (0.40-1.24), p=0.21     | 0.55 (0.30-0.99), p=0.05  |
| Other infections           | 1.89 (1.63-2.19), p<0.001    | 1.44 (1.24-1.67), p<0.001 |
|                            |                              |                           |
|                            |                              |                           |
|                            |                              |                           |

Each type of infection entered into the Cox regression models as a time-varying covariate. Model 1 adjusted for sex, birth year, and calendar year. Model 2 further adjusted for alcohol or substance use disorder as a time-varying covariate, as well as parental education, parental abuse, parental psychotic disorder, and other parental psychiatric disorders.
